# Supplementary material for: Immunogenetic Determinants of Susceptibility to Head and Neck Cancer in the Million Veteran Program Cohort
Source: PubMed Central journal article supplement — Cancer Res. 2022 Nov 15;83(3):386–97. doi: 10.1158/0008-5472.CAN-22-1641 (PMC9896026; doi:10.1158/0008-5472.can-22-1641), 2022-11-15
Supplement: can-22-1641_supplementary_data_suppst1-st3.pdf [file can-22-1641_supplementary_data_suppst1-st3.pdf]

**Table S1.** Number of selected immune genes in each sub-pathway

| <b>Sub-pathway annotation</b>                                                    | <b>No. of genes</b> |
|----------------------------------------------------------------------------------|---------------------|
| Release of cancer cell antigens                                                  | 74                  |
| Cancer antigen presentation                                                      | 101                 |
| T-cell priming and activation                                                    | 150                 |
| Immune cell localization to tumors                                               | 292                 |
| Stromal Factors                                                                  | 102                 |
| Recognition of cancer cells by T-cells                                           | 111                 |
| Killing of cancer cells                                                          | 179                 |
| Myeloid cell activity                                                            | 260                 |
| NK cell activity                                                                 | 28                  |
| Cell cycle and proliferation                                                     | 54                  |
| Tumor-intrinsic factors                                                          | 155                 |
| Immunometabolism                                                                 | 101                 |
| Common signaling pathways: Wnt, TGF- $\beta$ , NF- $\kappa$ B, TLR, and Jak/STAT | 162                 |
| <b>Total Immune Genes</b>                                                        | <b>757</b>          |
| Known GWAS genes from prior HNSCC                                                | 115                 |
| Human leukocyte antigen region (6p21.2)                                          | 44                  |
| Killer cell immunoglobulin-like receptors cluster                                | 17                  |
| Innate Database                                                                  | 950                 |
| <b>Total combining genes</b>                                                     | <b>1576</b>         |

**Abbreviation:** GWAS, genome-wide association studies; HNSCC, head and neck squamous cell carcinoma; OPC, oropharyngeal cancers.

**Table S2.** Functional enrichment analyses of the top-ranked susceptibility genes using Kyoto Encyclopedia of Genes and Genomes (KEGG) pathway and Gene Ontology (GO)

| Pathway                                                                                                  | Candidate genes presented                                                                | Background gene count | P-value               |
|----------------------------------------------------------------------------------------------------------|------------------------------------------------------------------------------------------|-----------------------|-----------------------|
| <b>Overall HNSCC susceptibility genes</b>                                                                |                                                                                          |                       |                       |
| Immunoglobulin complex                                                                                   | <i>ICAM5, HLA-DRB1, HLA-DQA1</i>                                                         | 3 of 43               | 0.002                 |
| Regulation of leukocyte differentiation                                                                  | <i>FANCA, HLA-DRB1</i>                                                                   | 2 of 261              | 0.047                 |
| <b>Non-OPC susceptibility genes</b>                                                                      |                                                                                          |                       |                       |
| Cellular response to stress                                                                              | <i>TP73, FANCA, IRAK2, TPM1, MGMT</i>                                                    | 5 of 139              | 0.014                 |
| Neurotrophin signaling pathway                                                                           | <i>TP73, IRAK2</i>                                                                       | 2 of 116              | 0.016                 |
| <b>OPC/HPV-positive OPC susceptibility genes</b>                                                         |                                                                                          |                       |                       |
| MHC class II protein complex                                                                             | <i>HLA-DRB1, HLA-DRB5, HLA-DQA1, HLA-DRA, HLA-DMB, HLA-DQB2</i>                          | 6 of 14               | 2.9x10 <sup>-15</sup> |
| Common signaling                                                                                         | <i>CDH2, CDH5, NTN1, LOXL2, HLA-DRB1, HLA-DRB5, HLA-DQA1, HLA-DRA, HLA-DMB, HLA-DQB2</i> | 10 of 162             | 1.3x10 <sup>-12</sup> |
| Autoimmune thyroid disease                                                                               | <i>HLA-DRA, HLA-DRB1, HLA-DRB5, HLA-DQA1, HLA-DMB</i>                                    | 5 of 49               | 4.4x10 <sup>-8</sup>  |
| <b>Risk factor sub-group susceptibility genes for Overall HNSCC (smoking, alcohol, overweight/obese)</b> |                                                                                          |                       |                       |
| Viral myocarditis                                                                                        | <i>CAPS8, HLA-DPB2, HLA-G, HLA-DOA</i>                                                   | 4 of 56               | 3.4x10 <sup>-7</sup>  |
| Regulation of T cell activation                                                                          | <i>NFkB-p65, FANCA, CD6, CD68, CD74/HLA-DG, SOCS6, HLA-G, HLA-DOA, HLA-DPB2</i>          | 9 of 302              | 2.8x10 <sup>-6</sup>  |
| Cell adhesion molecules                                                                                  | <i>CD6, CDH2, CDH5, HLA-G, HLA-DOA, HLA-DPB2</i>                                         | 6 of 139              | 7.8x10 <sup>-4</sup>  |

**Abbreviation:** HNSCC, head and neck squamous cell carcinoma; OPC, oropharyngeal cancers; HPV, human papillomavirus.

**Table S3.** The high-confident pair-wise protein-protein interaction (PPI) score, predicted by STRING (Search Tool for the Retrieval of Interacting Genes)

| Interaction pairs  |                  | Evidence       |          | Combined PPI score |
|--------------------|------------------|----------------|----------|--------------------|
| Protein (node 1)   | Protein (node 2) | Experimentally | Database |                    |
| CDH2               | CDH5             | 0              | 0.9      | 0.92               |
| IRAK2              | NFkB-p65         | 0              | 0.9      | 0.93               |
| CASP8              | NFkB-p65         | 0              | 0.9      | 0.95               |
| cKIT               | SOCS6            | 0.47           | 0.9      | 0.97               |
| <i>CD74/HLA-DG</i> | HLA-DOA          | 0.19           | 0.9      | 0.95               |
| <i>CD74/HLA-DG</i> | HLA-DMB          | 0.38           | 0.9      | 0.99               |
| <i>CD74/HLA-DG</i> | HLA-DRB5         | 0.35           | 0.9      | 0.99               |
| <i>CD74/HLA-DG</i> | HLA-DQA1         | 0.70           | 0.9      | 0.99               |
| <i>CD74/HLA-DG</i> | HLA-DQB2         | 0.41           | 0.9      | 0.99               |
| <i>CD74/HLA-DG</i> | HLA-DRB1         | 0.86           | 0.9      | 0.99               |
| <i>CD74/HLA-DG</i> | HLA-DRA          | 0.89           | 0.9      | 0.99               |
| HLA-DMB            | HLA-DOA          | 0.48           | 0.9      | 0.97               |
| HLA-DMB            | HLA-DQA1         | 0.27           | 0.9      | 0.96               |
| HLA-DMB            | HLA-DRB1         | 0.39           | 0.9      | 0.98               |
| HLA-DMB            | HLA-DRA          | 0.76           | 0.9      | 0.99               |
| HLA-DOA            | HLA-DRB5         | 0.20           | 0.9      | 0.93               |
| HLA-DOA            | HLA-DQB2         | 0.20           | 0.9      | 0.94               |
| HLA-DOA            | HLA-DRB1         | 0.20           | 0.9      | 0.94               |
| HLA-DQA1           | NCAM1/CD56       | 0              | 0.9      | 0.91               |
| HLA-DQA1           | HLA-DRB5         | 0.35           | 0.9      | 0.96               |
| HLA-DQA1           | HLA-DRB1         | 0.35           | 0.9      | 0.96               |
| HLA-DQA1           | HLA-DQB2         | 0.74           | 0.9      | 0.99               |
| HLA-DQB2           | HLA-DRA          | 0.30           | 0.9      | 0.95               |
| HLA-DRA            | HLA-DRB1         | 0.93           | 0.9      | 0.99               |
| HLA-DRA            | HLA-DRB5         | 0.93           | 0.9      | 0.99               |
| HLA-DRB1           | NCAM1/CD56       | 0              | 0.9      | 0.92               |
| HLA-DRB1           | HLA-DRB5         | 0.75           | 0.9      | 0.98               |
| HLA-G              | NCAM1/CD56       | 0              | 0.9      | 0.95               |
